# Supplementary material
Source: Royal Society of Chemistry journal article supplement (doi:10.1039/d5ea00165j)
Supplement: d5ea00165j1.pdf [file d5ea00165j1.pdf]

## SUPPLEMENTARY INFORMATION

Data related to measured and estimated temperature-dependent,  $k(T)$ , and room-temperature,  $k_{298}$ , kinetics of the set of ethers and haloethers considered in this work are detailed in SI-1, SI-5 and the *SI\_k298\_kT\_values.xlsx* excel file. Additional plots that extend Figure 4 and Figure 8 are provided for different complexes in SI-2 and SI-6 respectively. Intercomparison between the  $k(T)$  estimated by each method are presented in SI-7. Detailed calculations for the rate coefficient and effective tunnelling parameter are provided to give more insight to the reader on how the method and the code work (SI-3, SI-4, and the *SI\_calculations.xlsx* file). The main programme is provided in Python, with details in the SI-8 and the *READ\_ME.txt* file.

### **SI-1: Values of $k_{298}$ (experimental and predicted) and Arrhenius parameters (experimental) tabulated from the dataset studied.**

See Excel file “*SI\_k298\_kT\_values.xlsx*”.

**Table SI-1:** Experimental and predicted room-temperature rate coefficients ( $k_{298}$ ) for the studied dataset, in  $\text{cm}^3 \text{ molecule}^{-1} \text{ s}^{-1}$ . Experimental data include Arrhenius parameters ( $A_{\text{exp}}$ , in  $\text{cm}^3 \text{ molecule}^{-1} \text{ s}^{-1}$ ,  $(E_a/R)_{\text{exp}}$ , in K, and  $n_{\text{exp}}$ ) and the corresponding temperature ranges (from  $T_{\text{low}}$  to  $T_{\text{high}}$  in K). Predicted rate coefficients using the E-stateXvdW method from this work are reported at room-temperature, in  $\text{cm}^3 \text{ molecule}^{-1} \text{ s}^{-1}$ . The excel spreadsheet contains the additional predicted data using EPI Suite/Kwok and Atkinson (1995), Jenkin et al. (2018) and Carter (2021).<sup>1-4</sup>

|    | Name                        | SMILES            | Ref.     | $k_{\text{exp}}(298\text{K})$ | $A_{\text{exp}}$ | $(E_a/R)_{\text{exp}}$ | $n_{\text{exp}}$ | $T_{\text{low}}$ | $T_{\text{high}}$ | $k_{\text{E-stateXvdW}}(298\text{K})$ |
|----|-----------------------------|-------------------|----------|-------------------------------|------------------|------------------------|------------------|------------------|-------------------|---------------------------------------|
| 1  | methoxymethane              | COC               | <i>a</i> | 2,76E-12                      | 7,97E-13         | -373,98                | 2,26             | 195.0            | 1470.0            | 1,32E-12                              |
| 2  | methoxyethane               | COCC              | <i>a</i> | 6,56E-12                      | 1,70E-13         | -1095                  | 3,26             | 276.0            | 753.0             | 4,89E-12                              |
| 3  | dimethoxymethane            | COCOC             | <i>a</i> | 4,54E-12                      | 2,70E-14         | -1532                  | 4,62             | 231.0            | 617.0             | 5,09E-12                              |
| 4  | 2,4,6,8-Tetraoxanonane      | COCOCOCOC         | <i>b</i> | 1E-11                         |                  |                        |                  |                  |                   | 8,49E-12                              |
| 5  | 2,4,6,8,10-Pentaoxaundecane | COCOCOCOCOC       | <i>b</i> | 1,1E-11                       |                  |                        |                  |                  |                   | 9,94E-12                              |
| 6  | 1,3-dimethoxypropane        | COCCOC            | <i>a</i> | 4,93E-11                      |                  |                        |                  |                  |                   | 1,67E-11                              |
| 7  | 1,2-dimethoxyethane         | COCCOC            | <i>a</i> | 2,8E-11                       | 4,77E-13         | -1220                  | 2                | 234.0            | 372.0             | 1,25E-11                              |
| 8  | 1-methoxypropane            | CCOC              | <i>a</i> | 9,91E-12                      |                  |                        |                  |                  |                   | 1,05E-11                              |
| 9  | 1-propoxypropane            | CCOCCC            | <i>a</i> | 2,09E-11                      | 1,21E-12         | -854                   | 2,19             | 230.0            | 1381.0            | 2,14E-11                              |
| 10 | di-n-propoxymethane         | CCCOCCCC          | <i>a</i> | 2,7E-11                       | 4,30E-12         | -546                   |                  | 263.0            | 400.0             | 3,80E-11                              |
| 11 | di-n-pentyl ether           | CCCCOCCCC         | <i>a</i> | 3,3E-11                       | 7,80E-12         | -429                   |                  | 263.0            | 373.0             | 3,01E-11                              |
| 12 | 1-methoxybutane             | CCCCOC            | <i>a</i> | 1,45E-11                      | 1,01E-11         | -107                   |                  | 247.0            | 353.0             | 1,27E-11                              |
| 13 | 1-ethoxybutane              | CCCCOCC           | <i>a</i> | 2,2E-11                       | 6,60E-12         | -362                   |                  | 243.0            | 371.0             | 1,74E-11                              |
| 14 | di-n-butyl ether            | CCCCOCCCC         | <i>a</i> | 2,75E-11                      | 9,50E-14         | -1697                  | 3,82             | 230.0            | 1288.0            | 2,64E-11                              |
| 15 | di-n-butoxymethane          | CCCCOCOC          | <i>a</i> | 3,6E-11                       | 5,20E-12         | -580                   |                  | 260.0            | 400.0             | 4,46E-11                              |
| 16 | 2-ethoxy-2-methylpropane    | CCOC(C)(C)C       | <i>a</i> | 8,7E-12                       | 3,40E-12         | -280                   |                  | 230.0            | 400.0             | 8,70E-12                              |
| 17 | ethoxyethane                | CCOCC             | <i>a</i> | 1,25E-11                      | 4,21E-13         | -1014,86               | 2,67             | 230.0            | 1351.0            | 9,04E-12                              |
| 18 | ethyl propyl ether          | CCOCCC            | <i>a</i> | 1,12E-11                      |                  |                        |                  |                  |                   | 1,51E-11                              |
| 19 | 1-ethoxy-2-methoxyethane    | CCOCCOC           | <i>a</i> | 1,75E-11                      |                  |                        |                  |                  |                   | 1,88E-11                              |
| 20 | 1,2-diethoxyethane          | CCOCCOCC          | <i>a</i> | 5,7E-11                       | 5,22E-13         | -1400                  | 2                | 298.0            | 372.0             | 2,74E-11                              |
| 21 | diethoxymethane             | CCOCCOCC          | <i>a</i> | 1,97E-11                      | 3,42E-13         | -1212                  | 2                | 252.0            | 400.0             | 1,79E-11                              |
| 22 | trimethoxymethane           | COC(OC)OC         | <i>a</i> | 5E-12                         | 4,40E-14         | -1408,3                | 4,45             | 298.0            | 744.0             | 3,35E-12                              |
| 23 | methyl t-butyl ether        | CC(C)(C)OC        | <i>a</i> | 3,1E-12                       | 1,87E-13         | -843                   | 3,34             | 231.0            | 753.0             | 4,54E-12                              |
| 24 | di-tert-butyl ether         | CC(C)(C)OC(C)(C)C | <i>a</i> | 3,7E-12                       |                  |                        |                  |                  |                   | 9,11E-12                              |
| 25 | dimethoxypropane            | CC(C)(OC)OC       | <i>a</i> | 4,1E-12                       | 3,73E-12         | -30                    |                  | 240.0            | 440.0             | 5,63E-12                              |
| 26 | 2,2-diethoxypropane         | CC(C)(OCC)OCC     | <i>a</i> | 1,11E-11                      | 1,06E-11         | -15                    |                  | 240.0            | 440.0             | 1,85E-11                              |
| 27 | di-isobutoxymethane         | CC(C)COCOCC(C)C   | <i>a</i> | 3,6E-11                       |                  |                        |                  |                  |                   | 2,72E-11                              |
| 28 | diisopropyl ether           | CC(C)OC(C)C       | <i>a</i> | 1E-11                         | 2,97E-12         | -361                   |                  | 230.0            | 400.0             | 6,73E-12                              |
| 29 | di-isopropoxymethane        | CC(C)OCOC(C)C     | <i>a</i> | 3,8E-11                       | 4,40E-12         | -646                   |                  | 250.0            | 400.0             | 1,42E-11                              |
| 30 | 1,2-dimethoxypropane        | CC(COC)OC         | <i>c</i> | 1,43E-11                      |                  |                        |                  |                  |                   | 1,07E-11                              |
| 31 | di-isobutyl ether           | CC(COCC(C)C)C     | <i>a</i> | 2,6E-11                       |                  |                        |                  |                  |                   | 1,51E-11                              |
| 32 | 1,1-dimethoxyethane         | CC(OC)OC          | <i>a</i> | 8,9E-12                       |                  |                        |                  |                  |                   | 4,57E-12                              |

|    |                                                                           |                                                     |            |          |          |        |  |       |       |          |
|----|---------------------------------------------------------------------------|-----------------------------------------------------|------------|----------|----------|--------|--|-------|-------|----------|
| 33 | isopropyl isobutyl ether                                                  | CC(OCC(C)C)C                                        | <i>a</i>   | 2,1E-11  |          |        |  |       |       | 1,09E-11 |
| 34 | methyl <i>s</i> -butyl ether                                              | CCC(C)OC                                            | <i>a</i>   | 9,67E-12 |          |        |  |       |       | 8,93E-12 |
| 35 | di-2-butoxymethane                                                        | CCC(C)OCOC(C)C<br>C                                 | <i>a</i>   | 4,3E-11  | 8,70E-12 | -477   |  | 260.0 | 401.0 | 3,28E-11 |
| 36 | 2-methoxy-2-methylbutane                                                  | CCC(OC)(C)C                                         | <i>a</i>   | 5,6E-12  | 3,13E-12 | -172   |  | 231.0 | 300.0 | 9,56E-12 |
| 37 | 1,1,1,3,3,3-hexafluoro-2- <i>n</i> -propoxypropane                        | CCCOC(C(F)(F)F)<br>C(F)(F)F                         | <i>a</i>   | 2,01E-12 | 3,11E-12 | 141    |  | 253.0 | 328.0 | 8,68E-13 |
| 38 | 4-ethoxy-1,1,1,2,2,3,3,4,4,5,6,6,6-dodecafluoro-5-(trifluoromethyl)hexane | CCOC(C(C(C(F)(F)F)(F)(F)F)(C(C(F)(F)F)(C(F)(F)F)F)F | <i>a</i> * | 2,2E-14  |          |        |  |       |       | 3,44E-14 |
| 39 | 1-ethoxy-1,1,2,2,3,3,4,4,4-nonafluorobutane                               | CCOC(C(C(C(F)(F)F)(F)(F)F)(F)F                      | <i>a</i>   | 6,5E-14  |          |        |  |       |       | 1,07E-13 |
| 40 | 1-ethoxy-1,1,2,3,3,3-hexafluoro-2-(trifluoromethyl)propane                | CCOC(C(C(F)(F)F)(C(F)(F)F)F                         | <i>a</i>   | 7,9E-14  |          |        |  |       |       | 9,83E-14 |
| 41 | 1-ethoxy-1,1,2,3,3,3-hexafluoropropane                                    | CCOC(C(C(F)(F)F)F)(F)F                              | <i>a</i>   | 1,4E-13  |          |        |  |       |       | 2,33E-13 |
| 42 | 1,1,1,3,3,3-hexafluoro-2-ethoxypropane                                    | CCOC(C(F)(F)F)C(F)(F)F                              | <i>a</i>   | 1,08E-12 | 1,86E-12 | 162    |  | 253.0 | 328.0 | 2,63E-13 |
| 43 | 1-ethoxy-1,1,2,2-tetrafluoroethane                                        | CCOC(C(F)F)(F)F                                     | <i>a</i>   | 2,2E-13  | 2,10E-12 | 670    |  | 250.0 | 430.0 | 3,65E-13 |
| 44 | trifluoromethoxyethane                                                    | CCOC(F)(F)F                                         | <i>a</i>   | 1,5E-13  |          |        |  |       |       | 4,04E-13 |
| 45 | 1-chloro-2-ethoxyethane                                                   | CICCOCC                                             | <i>a</i>   | 8,3E-12  |          |        |  |       |       | 8,37E-12 |
| 46 | bis(2-chloroethyl) ether                                                  | CICCOCCCI                                           | <i>a</i>   | 7,6E-12  |          |        |  |       |       | 7,84E-12 |
| 47 | 1,1,1,2,2,3,3,4,4,5,5-undecafluoro-5-methoxypentane                       | COC(C(C(C(C(F)(F)F)(F)(F)F)(F)F)(F)F                | <i>a</i>   | 1,2E-14  |          |        |  |       |       | 1,49E-14 |
| 48 | 1,1,1,2,2,3,3,4,4-nonafluoro-4-methoxybutane                              | COC(C(C(C(F)(F)F)(F)F)(F)F                          | <i>a</i>   | 1,2E-14  | 1,30E-12 | 1400   |  | 288.0 | 368.0 | 1,74E-14 |
| 49 | 1,1,1,2,2,3,4,5,5,5-decafluoro-3-methoxy-4-(trifluoromethyl)pentane       | COC(C(C(F)(F)F)(C(C(F)(F)F)(F)F)F                   | <i>a</i>   | 1,1E-14  | 5,60E-13 | 1186   |  | 271.0 | 333.0 | 1,13E-14 |
| 50 | 2-[difluoro(methoxy)methyl]-1,1,1,2,3,3,3-heptafluoropropane              | COC(C(C(F)(F)F)(C(F)(F)F)F                          | <i>a</i>   | 1,2E-14  |          |        |  |       |       | 1,66E-14 |
| 51 | 1,1,1,2,2,3,3-heptafluoro-3-methoxypropane                                | COC(C(C(F)(F)F)(F)F)(F)F                            | <i>a</i>   | 1,1E-14  | 1,40E-12 | 1440   |  | 250.0 | 430.0 | 2,17E-14 |
| 52 | 1,1,1,2,3,3-hexafluoro-3-methoxypropane                                   | COC(C(C(F)(F)F)F)(F)F                               | <i>a</i>   | 2,1E-14  |          |        |  |       |       | 3,58E-14 |
| 53 | methoxyflurane                                                            | COC(C(Cl)Cl)(F)F                                    | <i>a</i>   | 2,06E-13 |          |        |  |       |       | 1,42E-13 |
| 54 | 2-chloro-1,1,2-trifluoro-1-methoxyethane                                  | COC(C(Cl)F)(F)F                                     | <i>a</i>   | 3,8E-14  | 2,59E-12 | 1260   |  | 273.0 | 363.0 | 7,99E-14 |
| 55 | 1,1,1,2,3,3,3-heptafluoro-2-methoxypropane                                | COC(C(F)(F)F)(C(F)(F)F)F                            | <i>a</i>   | 1,5E-14  | 1,30E-12 | 1330   |  | 250.0 | 430.0 | 2,03E-14 |
| 56 | 1,1,1,2,2-pentafluoro-2-methoxyethane                                     | COC(C(F)(F)F)(F)F                                   | <i>a</i>   | 1,19E-14 | 1,18E-12 | 1370   |  | 250.0 | 300.0 | 2,99E-14 |
| 57 | 1,1,1,3,3,3-hexafluoro-2-methoxypropane                                   | COC(C(F)(F)F)C(F)(F)F                               | <i>a</i>   | 2,14E-13 | 1,24E-12 | 523,07 |  | 253.0 | 328.0 | 3,95E-14 |
| 58 | 1,1,1,2-tetrafluoro-2-methoxyethane                                       | COC(C(F)(F)F)F                                      | <i>a</i>   | 1,6E-13  | 2,05E-12 | 760    |  | 253.0 | 328.0 | 6,47E-14 |
| 59 | 1,1,2,2-tetrafluoro-1-methoxyethane                                       | COC(C(F)F)(F)F                                      | <i>a</i>   | 2,2E-14  | 1,70E-12 | 1300   |  | 250.0 | 430.0 | 5,23E-14 |
| 60 | trifluoro(methoxy)methane                                                 | COC(F)(F)F                                          | <i>a</i>   | 1,2E-14  | 1,84E-12 | 1500   |  | 268.0 | 381.0 | 4,82E-14 |
| 61 | difluoro(methoxy)methane                                                  | COC(F)F                                             | <i>a</i>   | 3,5E-14  | 6,00E-12 | 1530   |  | 253.0 | 460.0 | 1,16E-13 |
| 62 | 1,1,1,2,2-pentafluoro-3-methoxypropane                                    | COCC(C(F)(F)F)(F)F                                  | <i>a</i>   | 7,84E-13 | 2,29E-12 | 319    |  | 263.0 | 353.0 | 1,32E-13 |
| 63 | 1,1,2,2-tetrafluoro-3-methoxypropane                                      | COCC(C(F)F)(F)F                                     | <i>a</i>   | 9,61E-13 | 2,74E-12 | 312    |  | 263.0 | 353.0 | 2,07E-13 |
| 64 | 1,1-dichloro-2-methoxyethane                                              | COCC(Cl)Cl                                          | <i>a</i>   | 2,1E-12  |          |        |  |       |       | 2,40E-12 |
| 65 | 1,1,1-trifluoro-2-methoxyethane                                           | COCC(F)(F)F                                         | <i>a</i>   | 6,39E-13 | 3,51E-12 | 508    |  | 263.0 | 353.0 | 2,26E-13 |

|    |                                                                                    |                                                            |          |          |          |      |  |       |       |          |
|----|------------------------------------------------------------------------------------|------------------------------------------------------------|----------|----------|----------|------|--|-------|-------|----------|
| 66 | 1-bromo-2-methoxyethane                                                            | COCCBr                                                     | <i>a</i> | 6,3E-12  |          |      |  |       |       | 7,72E-12 |
| 67 | 1,1,3-trimethoxypropane                                                            | COCCC(OC)OC                                                | <i>a</i> | 1,67E-11 |          |      |  |       |       | 1,23E-11 |
| 68 | 1,4-dimethoxybutane                                                                | COCCCCOC                                                   | <i>a</i> | 3E-11    |          |      |  |       |       | 2,00E-11 |
| 69 | 1-chloro-2-methoxyethane                                                           | COCCCl                                                     | <i>a</i> | 4,75E-12 |          |      |  |       |       | 4,81E-12 |
| 70 | methyl hypochlorite                                                                | COCl                                                       | <i>a</i> | 7E-13    | 2,40E-12 | 360  |  | 250.0 | 314.0 | 3,20E-13 |
| 71 | fluoro(fluoromethoxy)methane                                                       | FCOCF                                                      | <i>a</i> | 6E-14    |          |      |  |       |       | 2,10E-13 |
| 72 | difluoromethoxy(difluoro)methane                                                   | FC(OC(F)F)F                                                | <i>a</i> | 2,4E-15  | 1,10E-12 | 1830 |  | 251.0 | 314.0 | 5,78E-15 |
| 73 | difluoromethoxy(trifluoro)methane                                                  | FC(OC(F)(F)F)F                                             | <i>a</i> | 4,9E-16  | 4,60E-13 | 2040 |  | 298.0 | 393.0 | 1,62E-15 |
| 74 | bis(difluoromethoxy)-difluoromethane                                               | FC(OC(OC(F)F)(F)F)F                                        | <i>a</i> | 2,4E-15  |          |      |  |       |       | 7,06E-15 |
| 75 | 3-(difluoromethoxy)-1,1,1,2,2-pentafluoropropane                                   | FC(OCC(C(F)F)(F)F)F                                        | <i>a</i> | 1E-14    | 1,60E-12 | 1510 |  | 250.0 | 430.0 | 2,12E-14 |
| 76 | 3-(difluoromethoxy)-1,1,2,2-tetrafluoropropane                                     | FC(OCC(C(F)F)(F)F)F                                        | <i>a</i> | 1,6E-14  | 1,82E-12 | 1410 |  | 250.0 | 430.0 | 3,53E-14 |
| 77 | 2-[chloro(difluoro)methoxy]-1,1,1-trifluoroethane                                  | FC(OCC(F)(F)F)(Cl)F                                        | <i>a</i> | 4E-14    | 1,60E-12 | 1100 |  | 293.0 | 410.0 | 2,59E-14 |
| 78 | 2-(difluoromethoxy)-1,1,1-trifluoroethane                                          | FC(OCC(F)(F)F)F                                            | <i>a</i> | 1,1E-14  | 2,90E-12 | 1660 |  | 253.0 | 460.0 | 3,43E-14 |
| 79 | 1-(difluoromethoxy)-1,1,2-trifluoroethane                                          | FCC(OC(F)F)(F)F                                            | <i>a</i> | 5,4E-15  | 1,11E-12 | 1588 |  | 268.0 | 308.0 | 1,99E-14 |
| 80 | sevoflurane                                                                        | FCOC(C(F)F)C(F)F                                           | <i>a</i> | 3,5E-14  | 8,77E-13 | 960  |  | 241.0 | 422.0 | 2,54E-14 |
| 81 | desflurane                                                                         | FC(OC(C(F)F)F)F                                            | <i>a</i> | 4,2E-15  | 8,15E-13 | 1570 |  | 241.0 | 298.0 | 3,84E-15 |
| 82 | 1-(difluoromethoxy)-1,1,2,2-tetrafluoroethane                                      | FC(OC(C(F)F)(F)F)F                                         | <i>a</i> | 2,7E-15  | 5,80E-13 | 1600 |  | 253.0 | 407.0 | 4,94E-15 |
| 83 | 1,1,1,2,2,3,3,4,4-nonafluoro-4-[3-(1,1,2,2,3,3,4,4-nonafluorobutoxy)propoxy]butane | FC(C(C(C(F)F)(F)F)(F)F)(OCCCCOC(C(C(C(F)F)(F)F)(F)F)(F)F)F | <i>a</i> | 1,3E-13  |          |      |  |       |       | 1,03E-13 |
| 84 | 1,1,1,2,3,3-hexafluoro-3-(2,2,3,3-tetrafluoropropoxy)propane                       | FC(C(COC(C(C(F)F)F)F)(F)F)F                                | <i>a</i> | 1,29E-14 | 2,44E-12 | 1563 |  | 268.0 | 308.0 | 1,73E-14 |
| 85 | 1,1,1,2-tetrafluoro-2-(trifluoromethoxy)ethane                                     | FC(C(F)F)OC(F)F                                            | <i>a</i> | 1,15E-15 | 3,10E-13 | 1680 |  | 250.0 | 430.0 | 1,04E-15 |
| 86 | 1,1,1,2-tetrafluoro-2-(1,1,2,2-tetrafluoroethoxy)ethane                            | FC(C(OC(C(F)F)F)F)F                                        | <i>a</i> | 4,1E-15  | 5,50E-13 | 1462 |  | 267.0 | 407.0 | 3,69E-15 |
| 87 | 1,1,1,2,3,3-hexafluoro-3-(trifluoromethoxy)propane                                 | FC(C(OC(F)F)F)C(F)F                                        | <i>a</i> | 1,55E-15 | 4,10E-13 | 1662 |  | 270.0 | 406.0 | 1,32E-15 |
| 88 | 1,1,2,2-tetrafluoro-1-(trifluoromethoxy)ethane                                     | FC(C(OC(F)F)F)F                                            | <i>a</i> | 2,1E-15  | 5,30E-13 | 1655 |  | 269.0 | 403.0 | 1,99E-15 |
| 89 | 1,1,2-trifluoro-2-(trifluoromethoxy)ethane                                         | FC(C(OC(F)F)F)F                                            | <i>a</i> | 6,7E-15  |          |      |  |       |       | 6,66E-15 |
| 90 | 1,1,1,2,3,3-hexafluoro-3-(2,2,3,3-pentafluoropropoxy)propane                       | FC(C(OCC(C(F)F)F)F)C(F)F                                   | <i>a</i> | 6,3E-15  | 8,46E-13 | 1460 |  | 253.0 | 328.0 | 1,10E-14 |
| 91 | 1,1,2,2-Tetrafluoro-3-(1,1,2,2-tetrafluoroethoxy)propane                           | FC(C(OCC(C(F)F)F)F)F                                       | <i>d</i> | 1,52E-14 |          |      |  |       |       | 2,25E-14 |
| 92 | 1,1,1,2,3,3-hexafluoro-3-(2,2,2-trifluoroethoxy)propane                            | FC(C(OCC(F)F)F)C(F)F                                       | <i>a</i> | 8,7E-15  | 1,20E-12 | 1469 |  | 268.0 | 407.0 | 1,55E-14 |
| 93 | 1,1,2,2-tetrafluoro-1-(2,2,2-trifluoroethoxy)ethane                                | FC(C(OCC(F)F)F)F                                           | <i>a</i> | 9,5E-15  | 1,32E-12 | 1470 |  | 250.0 | 430.0 | 2,08E-14 |
| 94 | 1,1,1,2,3,3-hexafluoro-3-[3-(1,1,2,3,3,3-hexafluoropropoxy)propoxy]propane         | FC(C(OCCOC(C(F)F)F)F)C(F)F                                 | <i>a</i> | 2,3E-13  |          |      |  |       |       | 2,85E-13 |
| 95 | 1,1,1-trifluoro-2-(2,2,2-trifluoroethoxy)ethane                                    | FC(COCC(F)F)F                                              | <i>a</i> | 1,4E-13  | 2,80E-12 | 890  |  | 268.0 | 409.0 | 7,09E-14 |

|     |                                                                                     |                                                                 |            |          |          |         |      |       |        |          |
|-----|-------------------------------------------------------------------------------------|-----------------------------------------------------------------|------------|----------|----------|---------|------|-------|--------|----------|
| 96  | 1-(difluoromethoxy)-1,1,2,3,3,3-hexafluoropropane                                   | FC(OC(C(C(F)(F)F)(F)(F)F)                                       | <i>a</i>   | 1,6E-15  |          |         |      |       |        | 3,49E-15 |
| 97  | enflurane                                                                           | FC(OC(C(Cl)(F)(F)F)F                                            | <i>a</i>   | 1,2E-14  | 6,73E-13 | 1200    |      | 302.0 | 422.0  | 9,97E-15 |
| 98  | 1,1,1,3,3,3-hexafluoro-2-(trifluoromethoxy)propane                                  | FC(OC(C(F)(F)F)C(F)(F)F)F                                       | <i>a</i>   | 3E-16    |          |         |      |       |        | 7,09E-16 |
| 99  | 2-(difluoromethoxy)-1,1,1,3,3,3-hexafluoropropane                                   | FC(OC(C(F)(F)F)C(F)(F)F                                         | <i>a</i>   | 2,8E-15  | 1,03E-12 | 1760    |      | 284.0 | 398.0  | 2,68E-15 |
| 100 | isoflurane                                                                          | FC(OC(C(F)(F)F)C)F                                              | <i>a</i>   | 1,5E-14  | 1,10E-12 | 1275    |      | 250.0 | 430.0  | 7,79E-15 |
| 101 | 1,2-bis(difluoromethoxy)-1,1,2,2-tetrafluoroethane                                  | FC(OC(C(OC(F)F)(F)(F)F)F                                        | <i>a</i>   | 4,7E-15  |          |         |      |       |        | 4,70E-15 |
| 102 | 1-(difluoromethoxy)-2-[difluoromethoxy(difluoro)methoxy]-1,1,2,2-tetrafluoroethane  | FC(OC(OC(C(OC(F)F)(F)(F)F)(F)F)F)F                              | <i>a</i>   | 4,6E-15  |          |         |      |       |        | 2,07E-15 |
| 103 | oxirane                                                                             | O1CC1                                                           | <i>a</i>   | 9,1E-14  | 1,63E-12 | 856     | 2    | 298.0 | 435.0  | 9,57E-13 |
| 104 | 1,4-dioxane                                                                         | O1CCOCC1                                                        | <i>a</i>   | 1,15E-11 | 6,80E-12 | -159    |      | 240.0 | 440.0  | 3,58E-11 |
| 105 | 1,3,5-trioxane                                                                      | O1COCOC1                                                        | <i>a</i>   | 5,4E-12  | 1,50E-11 | 302     |      | 292.0 | 597.0  | 7,89E-12 |
| 106 | tetrahydrofuran                                                                     | C1CCCO1                                                         | <i>a</i>   | 1,67E-11 | 4,77E-12 | -375,69 | 1,20 | 260.0 | 1338.0 | 2,64E-11 |
| 107 | 2-Methyl-1,3-dioxolane                                                              | CC1OCCO1                                                        | <i>e</i>   | 9,78E-12 |          |         |      |       |        | 1,98E-11 |
| 108 | oxepane                                                                             | C1CCCCOC1                                                       | <i>a</i>   | 1,8E-11  | 9,80E-12 | -179    |      | 263.0 | 372.0  | 2,94E-11 |
| 109 | oxane                                                                               | C1CCCOC1                                                        | <i>a</i>   | 1,2E-11  | 7,80E-12 | -136    |      | 263.0 | 372.0  | 2,79E-11 |
| 110 | 1,3-dioxepane                                                                       | C1CCCOCO1                                                       | <i>a</i>   | 1,4E-11  | 6,00E-12 | -250    |      | 263.0 | 372.0  | 4,39E-11 |
| 111 | oxetane                                                                             | C1CCO1                                                          | <i>a</i>   | 1,03E-11 |          |         |      |       |        | 1,76E-11 |
| 112 | 1,3-dioxane                                                                         | C1CCOCO1                                                        | <i>a</i>   | 1E-11    | 8,60E-12 | -45     |      | 240.0 | 440.0  | 2,83E-11 |
| 113 | 1,3-dioxolane                                                                       | C1OCCO1                                                         | <i>a</i>   | 1E-11    |          |         |      |       |        | 2,08E-11 |
| 114 | cineole                                                                             | CC12CCC(CC1)C(O2)C)C                                            | <i>a</i>   | 1,04E-11 |          |         |      |       |        | 3,42E-11 |
| 115 | 2-methyloxolane                                                                     | CC1CCCO1                                                        | <i>a</i>   | 2,46E-11 | 2,57E-12 | -673    |      | 240.0 | 400.0  | 2,41E-11 |
| 116 | 4-methyl-1,3-dioxane                                                                | CC1CCOCO1                                                       | <i>a</i>   | 1,13E-11 |          |         |      |       |        | 2,49E-11 |
| 117 | cyclohexene oxide                                                                   | C1CCC2C(C1)O2                                                   | <i>a</i>   | 6,2E-12  | 6,70E-14 | -1349   | 3,4  | 251.0 | 373.0  | 6,77E-12 |
| 118 | methyl oxirane                                                                      | CC1CO1                                                          | <i>a</i>   | 4,67E-13 | 4,67E-13 | 0       |      | 261.0 | 335.0  | 1,58E-12 |
| 119 | 2,3-epoxybutane                                                                     | CC1OC1C                                                         | <i>a**</i> | 1,87E-12 |          |         |      |       |        | 2,14E-12 |
| 120 | ethyl oxirane                                                                       | CCC1CO1                                                         | <i>a</i>   | 1,92E-12 | 1,70E-14 | -1407   | 4,8  | 220.0 | 950.0  | 2,48E-12 |
| 121 | 1,2-epoxyhexane                                                                     | CCCCC1CO1                                                       | <i>a</i>   | 5,76E-12 |          |         |      |       |        | 4,70E-12 |
| 122 | 2-ethoxy-3,3,4,4,5-pentafluoro-2,5-bis(1,1,1,2,3,3,3-heptafluoropropan-2-yl)oxolane | CCOC1(OC(C(C1(F)F)(F)F)(F)C(C(F)(F)F)(F)F)C(C(F)(F)F)(C(F)F)F)F | <i>a</i>   | 5,50E-14 |          |         |      |       |        | 3,12E-14 |
| 123 | epichlorohydrin                                                                     | C1CC1CO1                                                        | <i>a</i>   | 3,97E-13 | 1,1E-14  | -1082   | 5,16 | 230.0 | 370.0  | 1,31E-12 |

<sup>a</sup>(McGillen *et al.*, 2020)<sup>5</sup> <sup>b</sup>(Metcalf *et al.*, 2025)<sup>6</sup> <sup>c</sup>(Dagaut *et al.*, 1989)<sup>7</sup> <sup>d</sup>(Tokuhashi, Takizawa, and Kondo, 2024)<sup>8</sup>

<sup>e</sup>(Stemmler, Mengon, and Kerr, 1996)<sup>9</sup> \*Using the relative-rate measurement, no recommendation from the database (McGillen *et al.* (2020)<sup>5</sup>). \*\*Assuming trans conformation.

## SI-2: Additional plots to Figure 4

The unique van der Waals complexes that can be formed for the full enumeration of acyclic alkyl ethers of formula  $C_nO_{\leq n-1}H_{2n+2}$ , where  $2 \leq n \leq 8$ , are presented per type of complex formed. The list of molecules was generated using MOLGEN software.

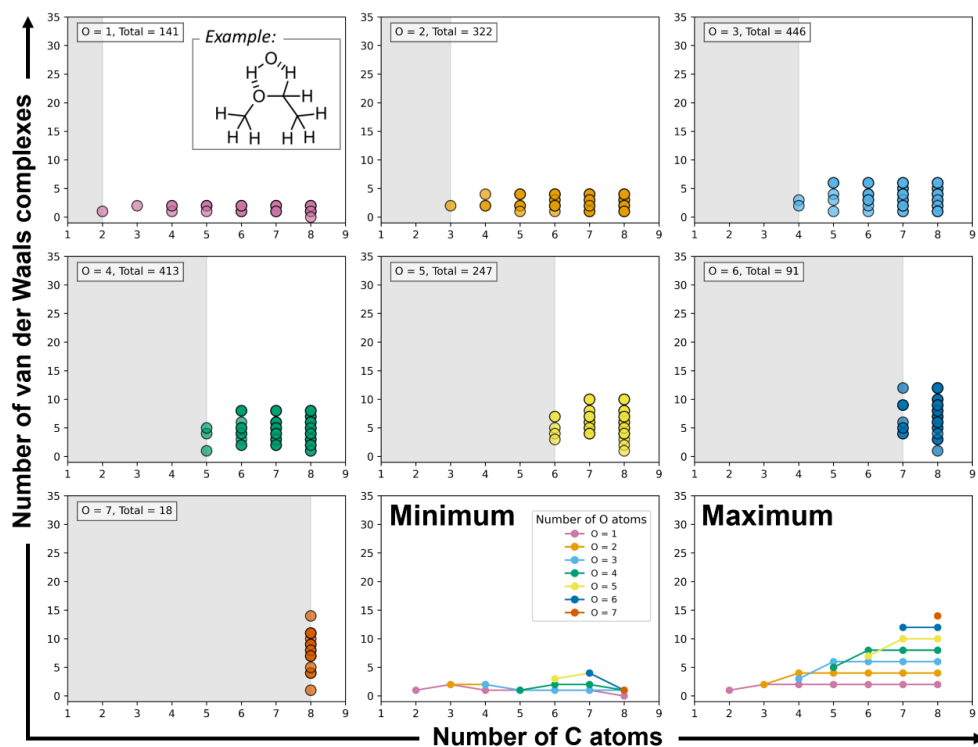

Figure SI-2a: The dependence of the number of possible unique van der Waals complexes considered upon carbon and oxygen number for a fully enumerated list of acyclic alkyl ethers,  $C_nO_{\leq n-1}H_{2n+2}$ , where  $2 \leq n \leq 8$  for 5-membered van der Waals complexes.

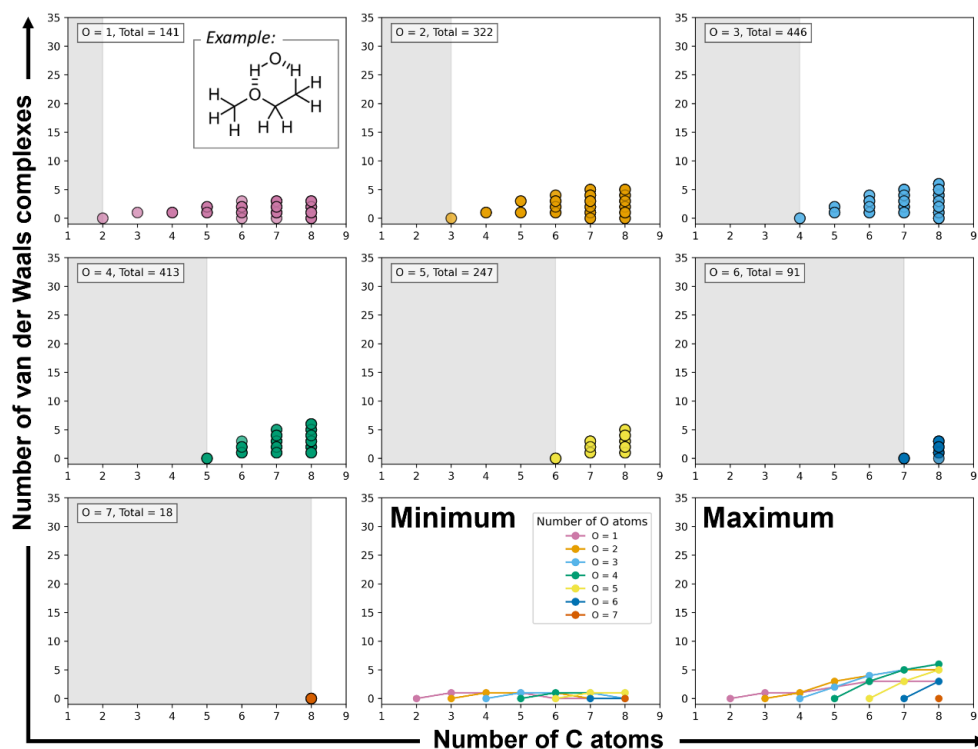

Figure SI-2b: The dependence of the number of possible unique van der Waals complexes considered upon carbon and oxygen number for a fully enumerated list of acyclic alkyl ethers,  $C_nO_{\leq n-1}H_{2n+2}$ , where  $2 \leq n \leq 8$  for 6-membered van der Waals complexes.

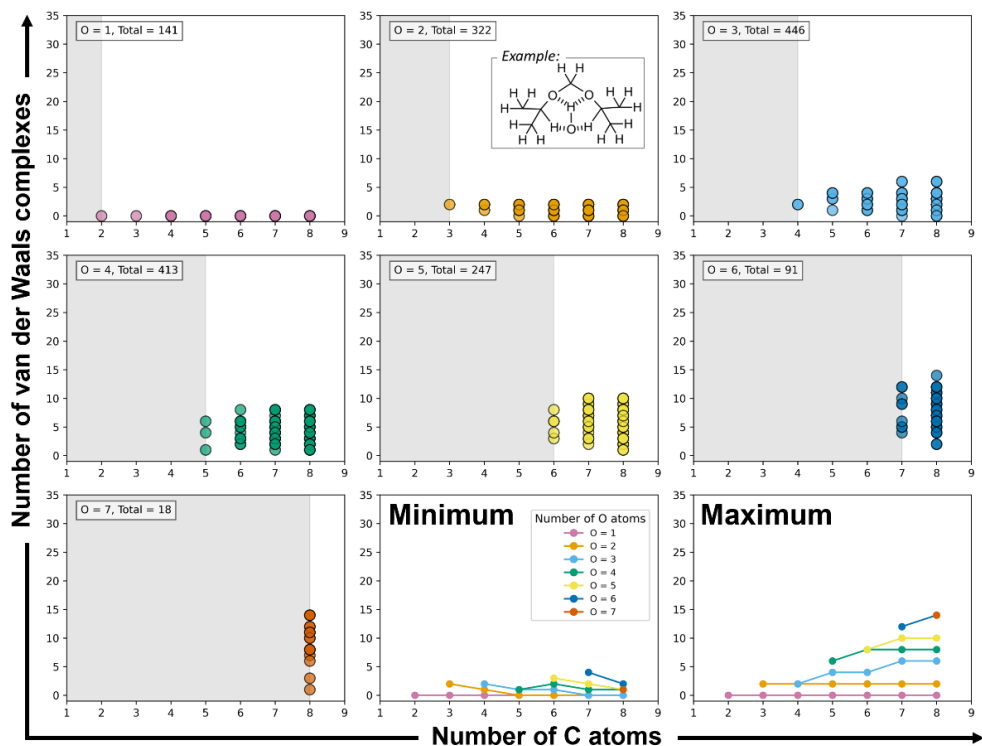

Figure SI-2c: The dependence of the number of possible unique van der Waals complexes considered upon carbon and oxygen number for a fully enumerated list of acyclic alkyl ethers,  $C_nO_{\leq n-1}H_{2n+2}$ , where  $2 \leq n \leq 8$  for bicyclic 5-membered van der Waals complexes.

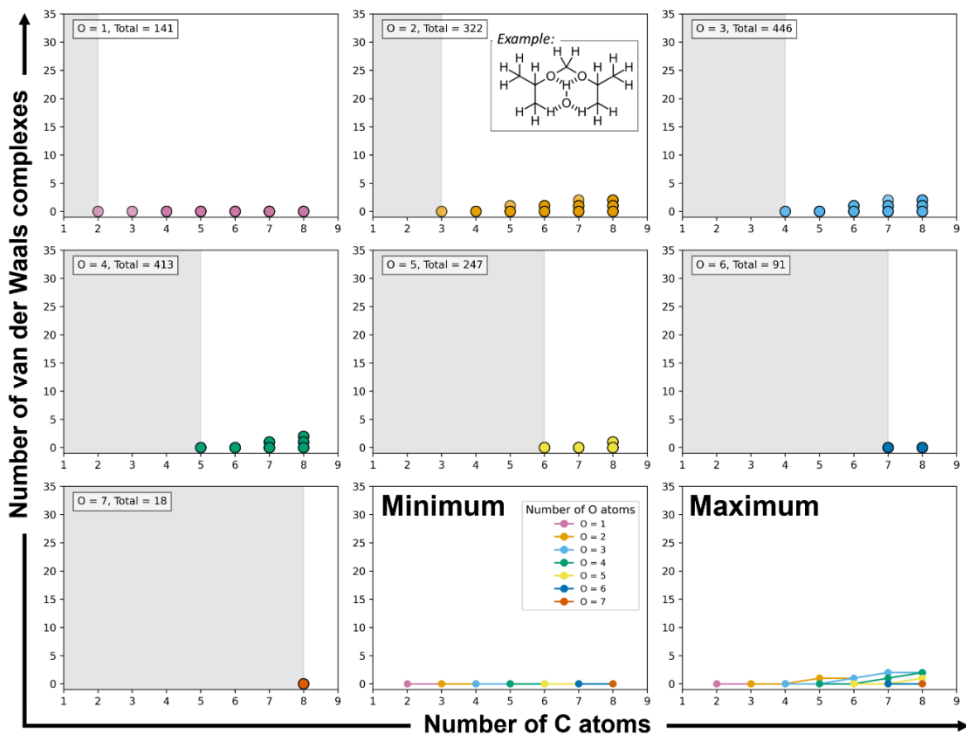

Figure SI-2d: The dependence of the number of possible unique van der Waals complexes considered upon carbon and oxygen number for a fully enumerated list of acyclic alkyl ethers,  $C_nO_{\leq n-1}H_{2n+2}$ , where  $2 \leq n \leq 8$  for bicyclic 6-membered van der Waals complexes.

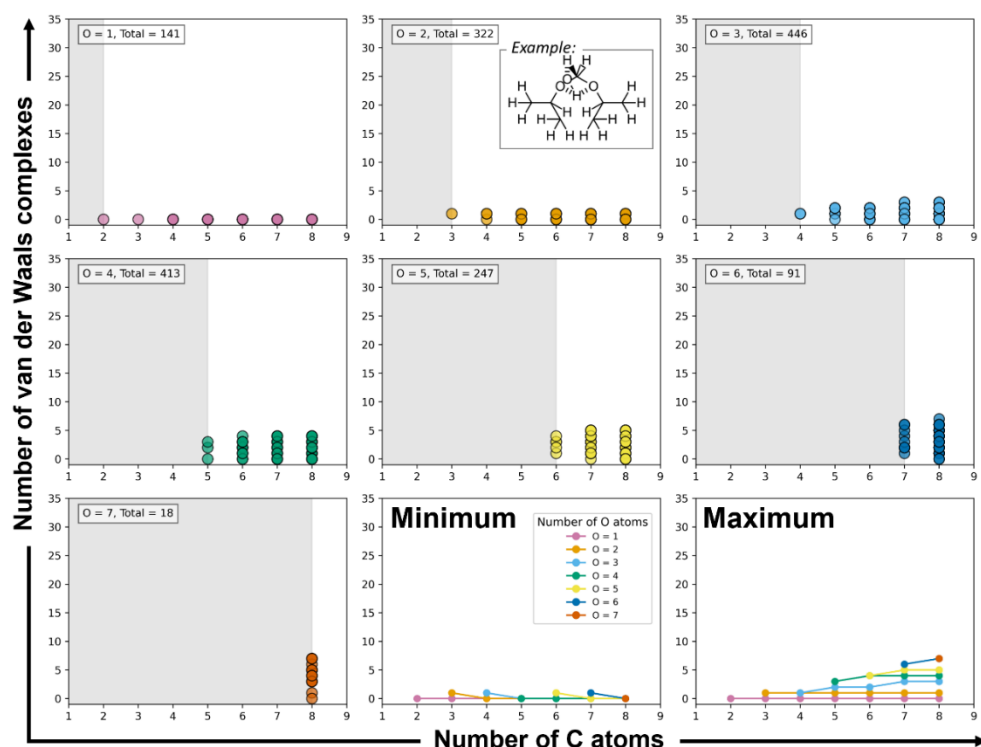

**Figure SI-2e:** The dependence of the number of possible unique van der Waals complexes considered upon carbon and oxygen number for a fully enumerated list of acyclic alkyl ethers,  $C_nO_{\leq n-1}H_{2n+2}$ , where  $2 \leq n \leq 8$  for bicyclic 5-membered van der Waals complexes on secondary carbons.

### SI-3: Formula to predict $k(T)$ for alkanes and haloalkanes:

The calculations can be found in the spreadsheet “SI\_calculations.xlsx”.

Below are the methodology and excel formula to copy/paste to derive the parameters  $A$ ,  $B$ ,  $n$  for atom  $C_i$  used in (Eq. 1):

$$k_{\text{total}}(T) = \sum_i \kappa_i(T) A_i \exp\left(-\frac{B_i}{T}\right) \left(\frac{T}{298}\right)^{n_i} = \sum_i \kappa_i(T) k_{\text{base},i}(T) \quad 1.$$

to predict site-specific temperature dependent rate coefficients using the original E-state method (see below Table SI-2 and Table SI-3 from McGillen et al. (2024) (Tables 1 and 2 in the original paper).

**Table SI-2:** Fitting parameters for making site-specific estimates of room-temperature rate coefficients using the E-state method (McGillen et al., 2024).

| Hydrogen count | $a$      | $b$      | $c$       |
|----------------|----------|----------|-----------|
| 3 (primary)    | 0.235348 | 0.448094 | 15.226433 |
| 2 (secondary)  | 0.079290 | 0.770329 | 13.470563 |
| 1 (tertiary)   | 0.051234 | 0.723300 | 12.452133 |

Use Table SI-3 to get  $k_{298,i} = n_{Hi} \times 10^{(a_{298,i} S_i^2 + b_{298,i} S_i - c_{298,i})}$  (Eq. 3) with  $a_{298}$ ,  $b_{298}$  and  $c_{298}$  taken from Table SI-2.

**Table SI-3:** Fitting parameters for making site-specific temperature-dependent estimates of rate coefficients using the E-state method (McGillen et al., 2024).

| Polynomial fitting parameters            |              |                         |             |
|------------------------------------------|--------------|-------------------------|-------------|
| Hydrogen count                           | <i>a</i>     | <i>b</i>                | <i>c</i>    |
| 3 (primary)                              | 0.499883684  | $3.4716 \times 10^{-8}$ | 15.02936825 |
| 2 (secondary)                            | 0.071820619  | 0.732006578             | 13.37605256 |
| 1 (tertiary)                             | 0.044353068  | 0.685568344             | 12.48928548 |
| Temperature-dependent fitting parameters |              |                         |             |
| <i>m</i>                                 | <i>d</i>     | <i>f</i>                | <i>g</i>    |
| -199.2590651                             | -2242.434844 | 0.797686801             | 2.911224679 |

Use Table SI-3 to get the factor  $B = E_a/R = m \times (a_{\text{temp},i} S_i^2 + b_{\text{temp},i} S_i - c_{\text{temp},i}) + d_{\text{temp},i}$  with *m*, *a*<sub>temp</sub>, *b*<sub>temp</sub>, *c*<sub>temp</sub> and *d*<sub>temp</sub> taken from Table SI-3 and  $R = 0.00831446261815324 \text{ J mol}^{-1} \text{ K}$ , the factor  $A = k_{298} \times \exp(B/298)$  (Eq. 10), and the factor  $n = f + E_a/g$  (Eq. 12) with *f* and *g* as in Table SI-3.

To obtain each Arrhenius parameter and  $k_{\text{base}}(T)$  using *S*<sub>Ci</sub> and *T* in Excel:

**Hydrogen count: H<sub>s</sub> = 3 (primary)**

$$B3 = -199.2590651 * (0.499883684 * S\_Ci^2 + 3.4716 * 10^{-8} * S\_Ci - 15.02936825) - 2242.434844$$

$$A3 = 3 * 10^{(0.235348 * S\_Ci^2 + 0.448094 * S\_Ci - 15.226433)} * \text{EXP}(B3 / 298)$$

$$n3 = 0.797686801 + B3 * 0.00831446261815324 / 2.91122467932999$$

$$k_{\text{base}} = A3 * \text{EXP}(-B3/T) * (T/298)^{n3}$$

**Hydrogen count: H<sub>s</sub> = 2 (secondary)**

$$B2 = -199.2590651 * (0.071820619 * S\_Ci^2 + 0.732006578 * S\_Ci - 13.37605256) - 2242.434844$$

$$A2 = 2 * 10^{(0.079290 * S\_Ci^2 + 0.770329 * S\_Ci - 13.470563)} * \text{EXP}(B2 / 298)$$

$$n2 = 0.797686801 + B2 * 0.00831446261815324 / 2.91122467932999$$

$$k_{\text{base}} = A2 * \text{EXP}(-B2/T) * (T/298)^{n2}$$

**Hydrogen count: H<sub>s</sub> = 1 (tertiary)**

$$B1 = -199.2590651 * (0.044353068 * S\_Ci^2 + 0.685568344 * S\_Ci - 12.48928548) - 2242.434844$$

$$A1 = 10^{(0.051234 * S\_Ci^2 + 0.723300 * S\_Ci - 12.452133)} * \text{EXP}(B1 / 298)$$

$$n1 = 0.797686801 + B1 * 0.00831446261815324 / 2.91122467932999$$

$$k_{\text{base}} = A1 * \text{EXP}(-B1/T) * (T/298)^{n1}$$

**SI-4: Calculation of  $\kappa_i$  for the example molecules in Figure 3 at room-temperature (298K):**

The calculations can be found in the spreadsheet “SI\_calculations.xlsx”.

The values of the E-states are in the code’s output and can be calculated as described in the paper. Units are those specified in the paper.

**Molecule (1): COCC**

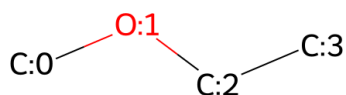

For the molecule M1, each reactive site has one possible complex configuration (see details on the substitution type and complex configuration in legend of the Figure 3).

Site 1, Atom C0: correction for complex (1)A, involving atom O<sub>1</sub>.

$$\kappa_1 = \alpha_{5\text{-mem., prim}} \cdot \log S(O_1) \cdot \exp\left(\frac{\beta_{5\text{-mem., prim}}}{T}\right)$$

SI(C<sub>0</sub>) = 1.6806 and  $k_{\text{base},1} = 4.66 \times 10^{-14}$  with Arrhenius parameter for H<sub>s</sub>=3: A=2.26×10<sup>-13</sup>, B=470.99, n=2.14.

SI(O<sub>1</sub>) = 4.5417,  $\kappa_1 = 17.301$  and  $k_{\text{tot},1} = 8.06 \times 10^{-13}$ .

Site 2, Atom C2: correction for complex (1)B, involving atom O<sub>1</sub>.

$$\kappa_2 = \alpha_{5\text{-mem., sec}} \cdot \log S(O_1) \cdot \exp\left(\frac{\beta_{5\text{-mem., sec}}}{T}\right)$$

SI(C<sub>2</sub>) = 0.8194 and  $k_{\text{base},2} = 3.27 \times 10^{-13}$  with Arrhenius parameter for H<sub>s</sub>=2: A=8.77×10<sup>-13</sup>, B=293.73, n=1.64.

SI(O<sub>1</sub>) = 4.5417,  $\kappa_2 = 9.617$  and  $k_{\text{tot},2} = 3.15 \times 10^{-12}$ .

Site 3, Atom C3: correction for complex (1)C, involving atom O<sub>1</sub>.

$$\kappa_3 = \alpha_{6\text{-mem., prim}} \cdot \log S(O_1) \cdot \exp\left(\frac{\beta_{6\text{-mem., prim}}}{T}\right)$$

SI(C<sub>3</sub>) = 1.9583 and  $k_{\text{base},3} = 1.07 \times 10^{-13}$  with Arrhenius parameter for H<sub>s</sub>=3: A=3.72×10<sup>-13</sup>, B=370.31, n=1.86.

SI(O<sub>1</sub>) = 4.5417,  $\kappa_3 = 8.716$  and  $k_{\text{tot},3} = 9.36 \times 10^{-13}$ .

>  $k_{\text{tot}} = 4.89 \times 10^{-12}$

Molecule (2): CC(C)OCOC(C)C

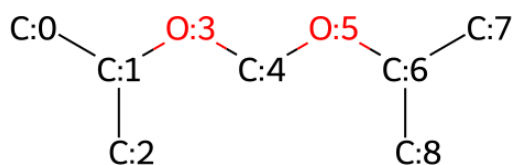

For the molecule (2), each reactive site can have one or more possible complex configuration (see details on the substitution type and complex configuration in legend of the Figure 3).

Atom 0, 2, 7 and 8: because the molecule is symmetrical, these reactive sites are identical.

Atom 1 and 6: because the molecule is symmetrical, these reactive sites are identical.

The E-state values of O<sub>3</sub> and O<sub>5</sub> are also equal.

Site 1, Atoms 0/2/7/8: This site forms monocyclic complex (2)C with O<sub>3</sub> (= O<sub>5</sub>) and bicyclic complex (2)B with O<sub>3</sub> and O<sub>5</sub>. Following the priority rules, since they are all 6-membered complexes, this results in correction for bicyclic complex (2)B with O<sub>3</sub> and O<sub>5</sub>.

$$\begin{aligned}\kappa_1 &= \alpha_{6\text{-mem., prim}} \cdot \log S(\text{O}_3) \cdot \exp\left(\frac{\beta_{6\text{-mem., prim}}}{T}\right) + \alpha_{6\text{-mem., prim}} \cdot \log S(\text{O}_5) \cdot \exp\left(\frac{\beta_{6\text{-mem., prim}}}{T}\right) \\ &= \alpha_{6\text{-mem., prim}} \cdot \exp\left(\frac{\beta_{6\text{-mem., prim}}}{T}\right) \cdot [\log S(\text{O}_3) + \log S(\text{O}_5)]\end{aligned}$$

SI(C<sub>0</sub>) = 1.989769 = SI(C<sub>2</sub>) = SI(C<sub>7</sub>) = SI(C<sub>8</sub>) and  $k_{\text{base},1} = 1.19 \times 10^{-13}$  with Arrhenius parameter for H<sub>s</sub>=3: A=3.94×10<sup>-13</sup>, B=357.94, n=1.82.

SI(O<sub>3</sub>) = 5.13042,  $\kappa_1 = 18.837$  and  $k_{\text{tot},1} = 2.23 \times 10^{-12} = k_{\text{tot},2} = k_{\text{tot},7} = k_{\text{tot},8}$ .

Note that the site-specific rate on the terminal carbon in the molecule is thus equal to  $4 \times 2.23 \times 10^{-12} = 8.94 \times 10^{-12}$ .

Site 2, Atoms 1 and 6: Because the molecule is symmetrical, these reactive sites are identical. This site forms monocyclic complex (2)A with O<sub>3</sub> (= O<sub>5</sub>) and bicyclic complex (2)F with O<sub>3</sub> and O<sub>5</sub>. Following the priority rules, since they are all 5-membered complexes, this results in correction for bicyclic complex (2)F with O<sub>3</sub> and O<sub>5</sub>.

$$\kappa_2 = \alpha_{5\text{-mem., tert}} \cdot \exp\left(\frac{\beta_{5\text{-mem., tert}}}{T}\right) \cdot [\log S(\text{O}_3) + \log S(\text{O}_5)]$$

SI(C<sub>1</sub>) = 0.267355 = SI(C<sub>6</sub>) and  $k_{\text{base},2} = 5.56 \times 10^{-13}$  with Arrhenius parameter for H<sub>s</sub>=1: A=1.12×10<sup>-12</sup>, B=209.01, n=1.39.

SI(O<sub>3</sub>) = 5.13042,  $\kappa_2 = 2.031$  and  $k_{\text{tot},2} = 1.13 \times 10^{-12}$ .

Note that the site-specific rate on the tertiary carbon in the molecule is thus equal to  $2 \times 1.13 \times 10^{-12} = 2.26 \times 10^{-12}$ .

Site 3, Atom C4: monocyclic complex (2)E with O<sub>3</sub> (= O<sub>5</sub>) and bicyclic complex (2)D with O<sub>3</sub> and O<sub>5</sub>. Following the priority rules, since they are all 5-membered complexes, this results in correction for bicyclic complex (2)D with O<sub>3</sub> and O<sub>5</sub>.

$$\kappa_3 = \alpha_{5\text{-mem., sec}} \cdot \exp\left(\frac{\beta_{5\text{-mem., sec}}}{T}\right) \cdot [\log S(\text{O}_3) + \log S(\text{O}_5)]$$

SI(C<sub>4</sub>) = 0.412038 and  $k_{\text{base},3} = 1.45 \times 10^{-13}$  with Arrhenius parameter for H<sub>s</sub>=2: A=4.86×10<sup>-13</sup>, B=360.34, n=1.83.

SI(O<sub>3</sub>) = 5.13042,  $\kappa_3 = 20.784$  and  $k_{\text{tot},3} = 3.01 \times 10^{-12}$ .

>  $k_{\text{tot}} = 1.42 \times 10^{-11}$

**SI-5: Experimental and predicted temperature-dependent (190–1500K) rate coefficients for the dataset studied, using all the predictive methods figuring in Figure 7, when existing.**

See Excel file “SI\_k298\_kT\_values.xlsx”.

**SI-6: Additional plot to Figure 8**

The estimates of the method of Jenkin *et al.* (2018) are plotted together with the estimations of the other approaches; the application temperature range (250–400K) is highlighted in green, and values outside this range are extrapolated.

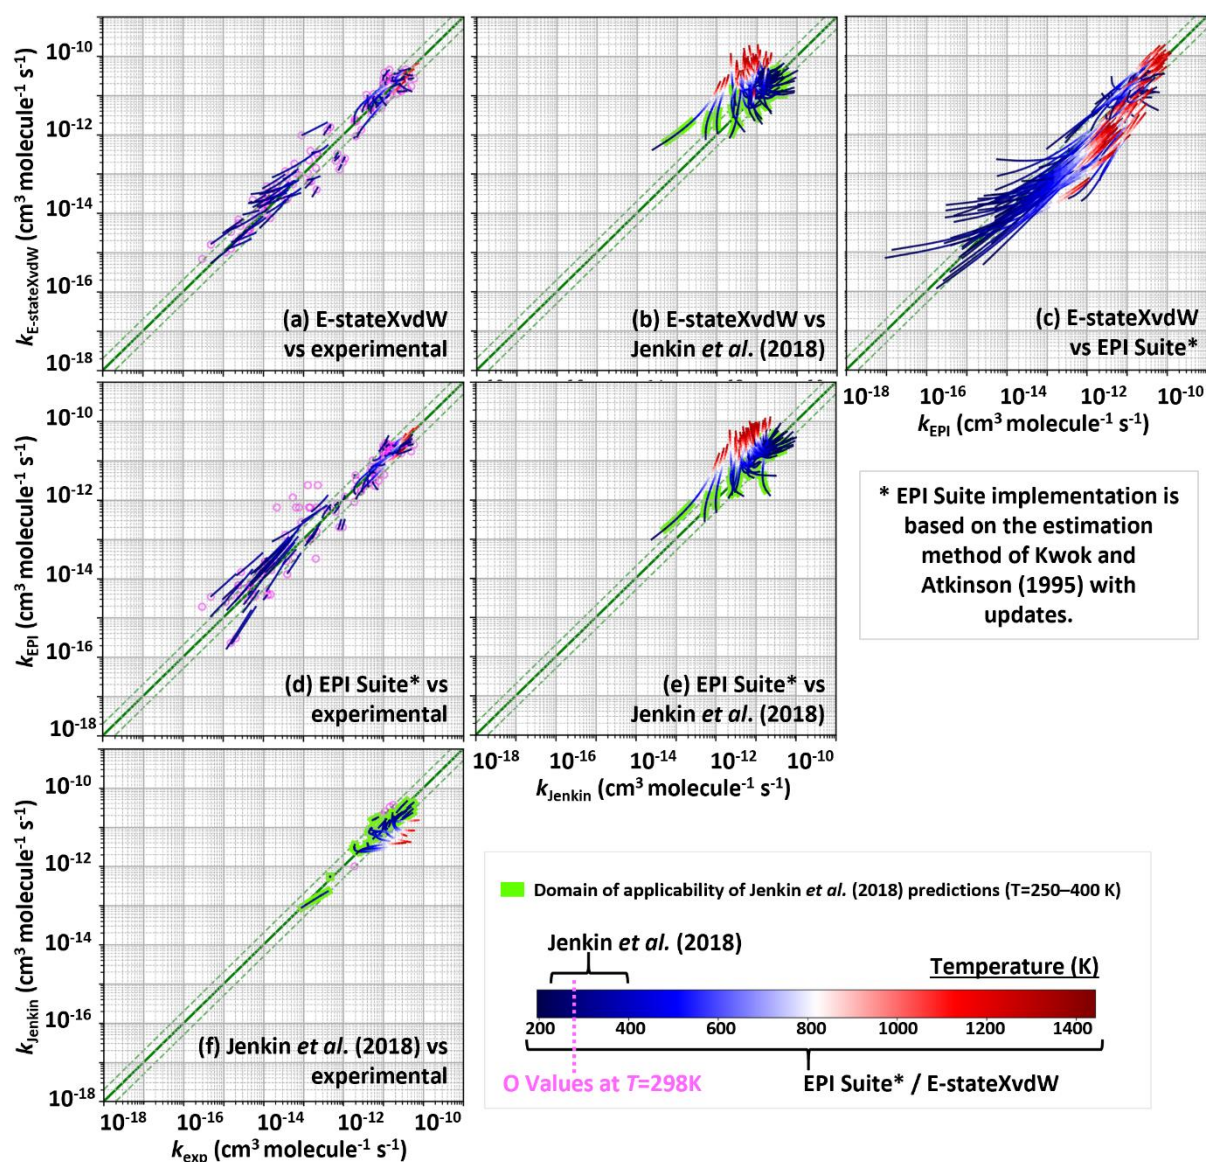

**Figure SI-6:** Temperature-dependent predictions of  $k(T)$  based on the E-stateXvdW method (panel (a), (b) and (f)), the Kwok and Atkinson (1995)<sup>2</sup> approach (implemented in EPI Suite<sup>1</sup>) (panel (d), (e) and (f)), and the Jenkin *et al.* (2018)<sup>4</sup> method (panel (b), (c) and (d)), plotted against all available temperature-dependent experimental data. The extrapolation of Jenkin's method over the temperature range not covered by the original model are plotted, and the applicability domain of the method is highlighted in green.

### **SI-7: Intercomparison of the estimates between each predictive method and ratio with experimental data**

The  $k(T)$  estimates obtained, where available, using the 3 temperature-dependent SARs discussed in the main text (Kwok and Atkinson (as implemented in EPI Suite), Jenkin *et al.* (2018), and the E-stateXvdW approach) are presented alongside experimental data (McGillen *et al.*, 2020). This allows for a direct comparison of the performance of the different estimation techniques. For example, in

cases where experimental data are lacking, our method can still be compared to EPI Suite predictions, which cover the full dataset and temperature range (~190–1500 K).

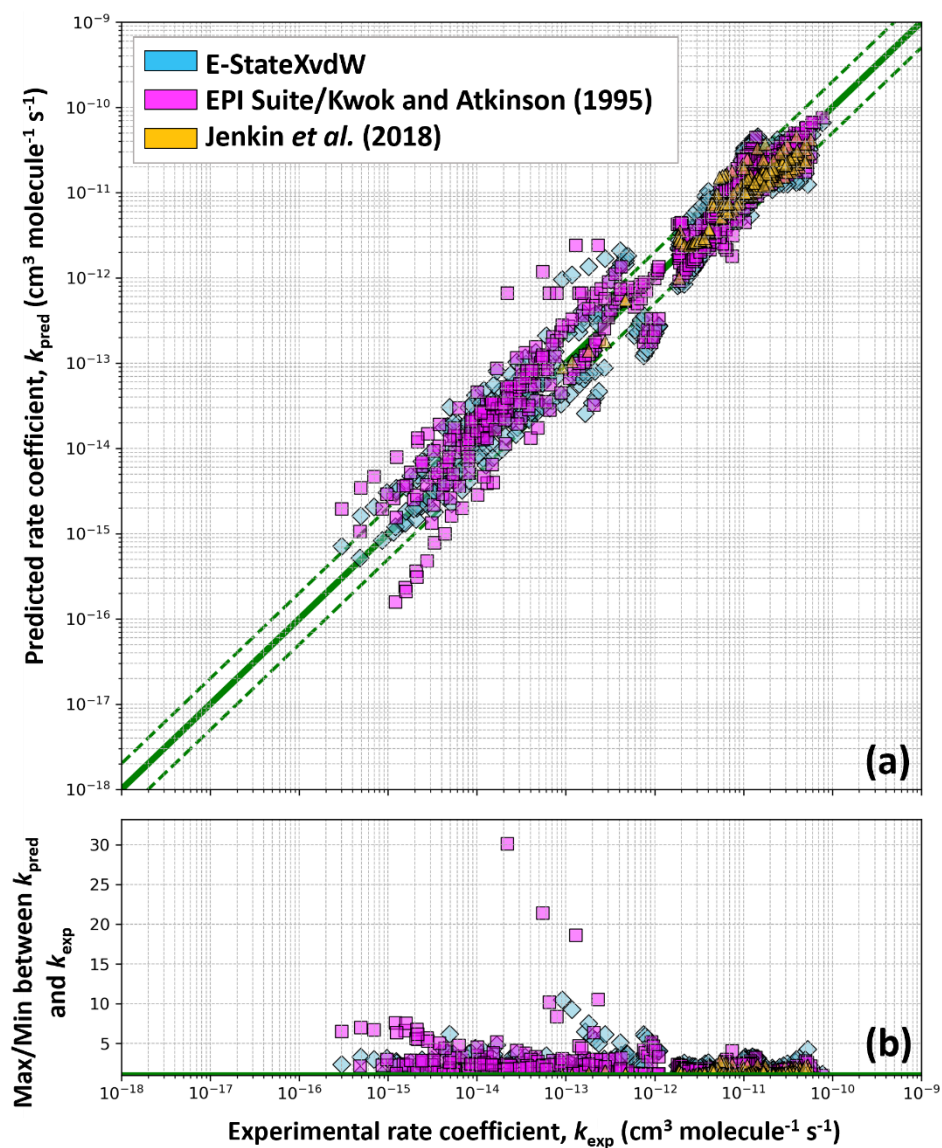

**Figure SI-7a:** (a) Temperature-dependent predictions of  $k(T)$  based on the E-stateXvdW method, the Kwok and Atkinson (1995)<sup>2</sup> approach (implemented in EPI Suite<sup>1</sup>) and the Jenkin *et al.* (2018)<sup>4</sup> method, plotted against all available temperature-dependent experimental data. Ratios against x-axis are plotted in panel (b).

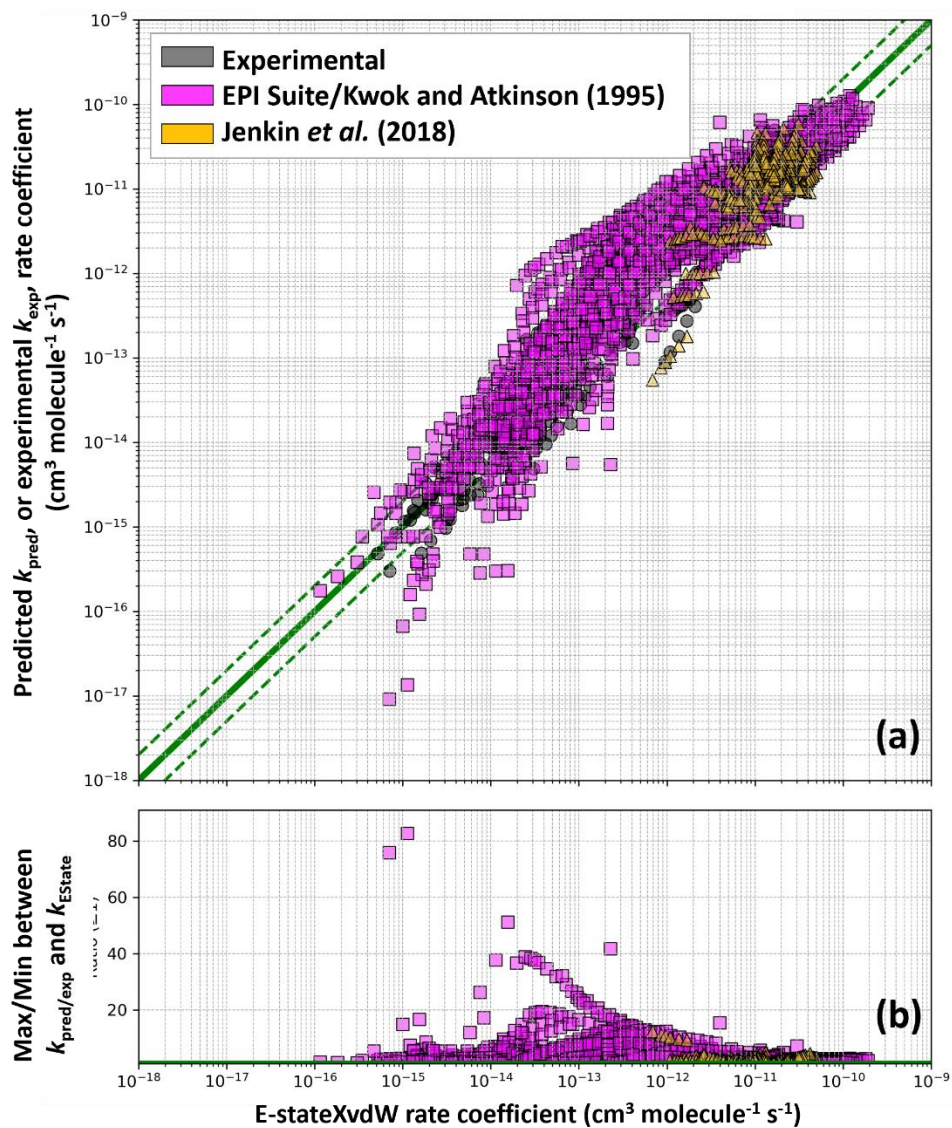

**Figure SI-7b:** (a) Temperature-dependent measurements and predictions of  $k(T)$  based on the Kwok and Atkinson (1995)<sup>2</sup> approach (implemented in EPI Suite<sup>1</sup>) and the Jenkin *et al.* (2018)<sup>4</sup> method, plotted against all available temperature-dependent E-stateXvdW predictions. Ratios against x-axis are plotted in panel (b).

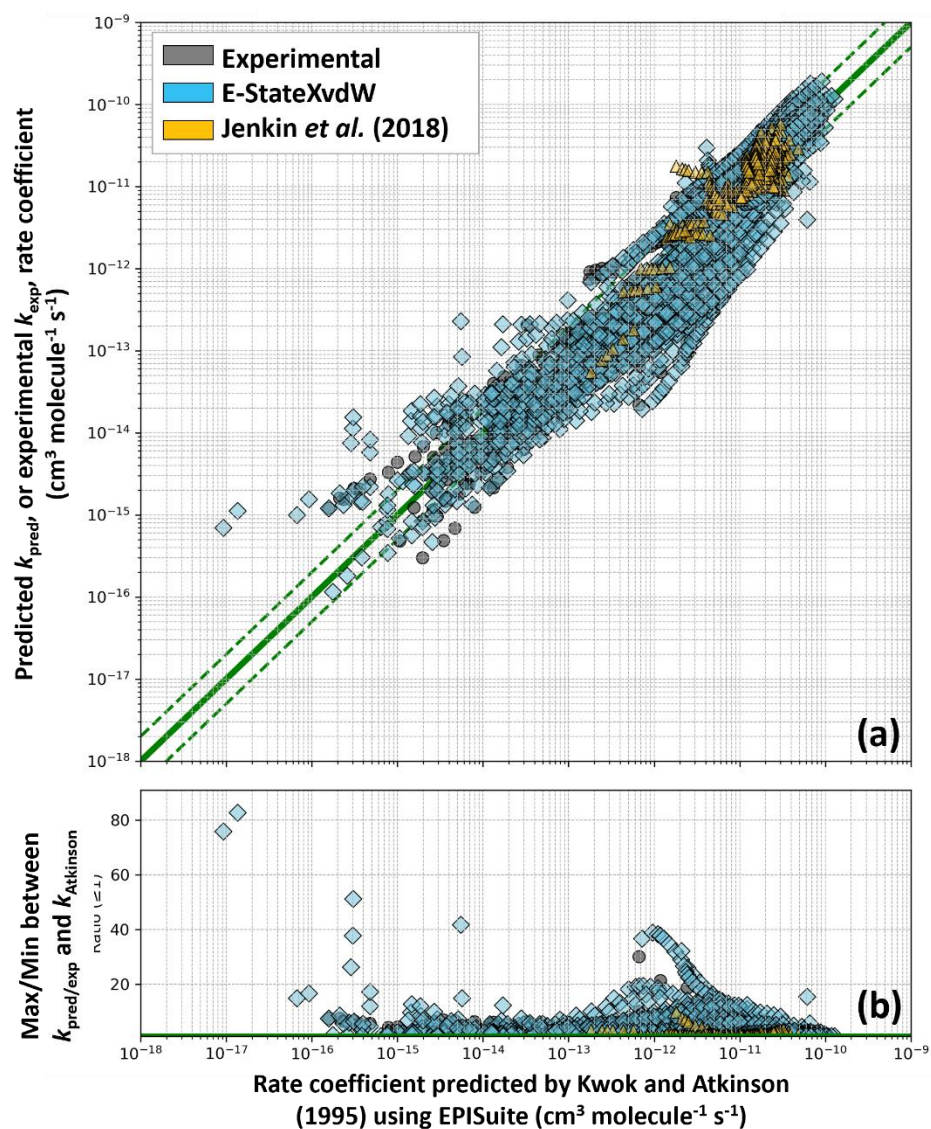

**Figure SI-7c:** (a) Temperature-dependent measurements and predictions of  $k(T)$  based on the E-stateXvdW method and the Jenkin *et al.* (2018)<sup>4</sup> method, plotted against all available temperature-dependent predictions using the Kwok and Atkinson (1995)<sup>2</sup> approach (implemented in EPI Suite<sup>1</sup>). Ratios against x-axis are plotted in panel (b).

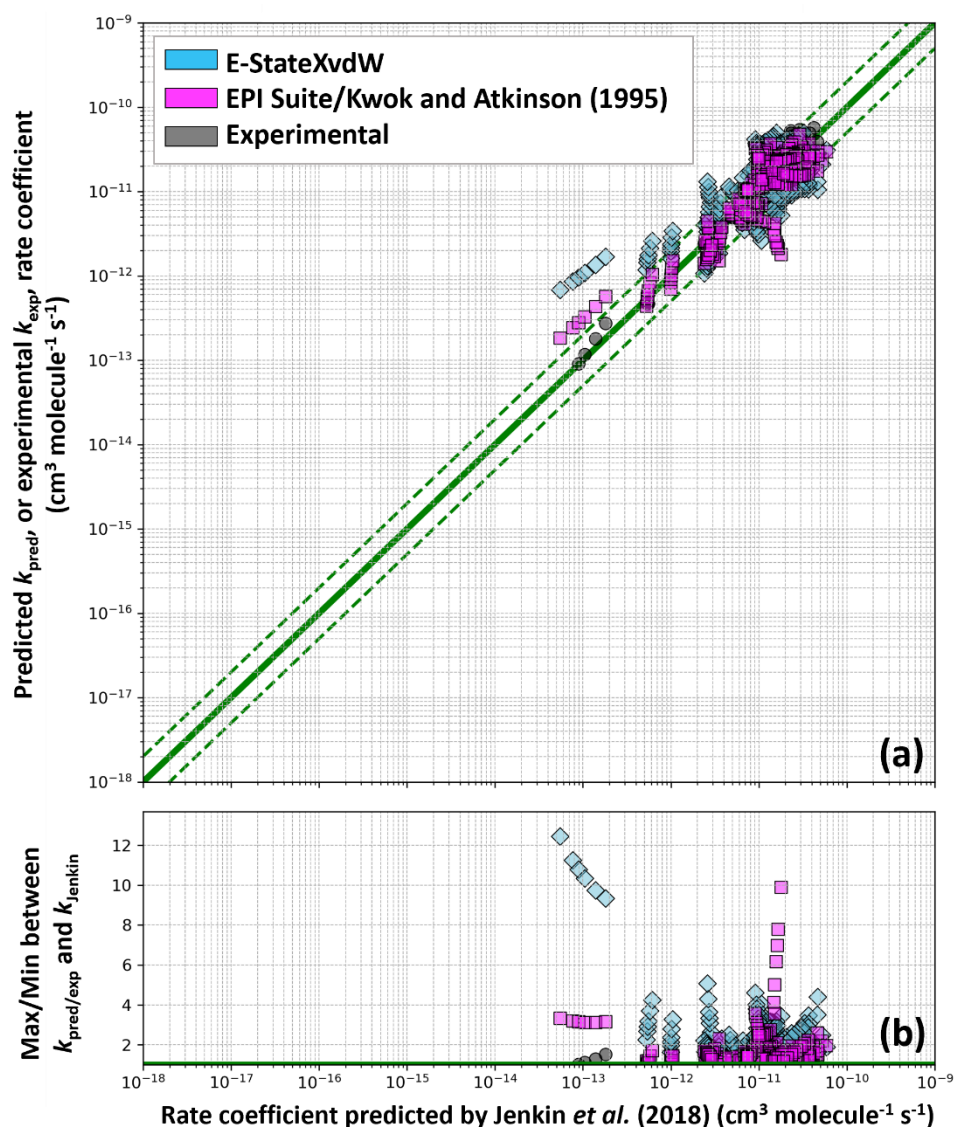

**Figure SI-7d:** (a) Temperature-dependent measurements and predictions of  $k(T)$  based on the Kwok and Atkinson (1995)<sup>2</sup> approach (implemented in EPI Suite<sup>1</sup>) and E-stateXvdW approach, plotted against all available temperature-dependent predictions using the Jenkin *et al.* (2018)<sup>4</sup> method. Ratios against x-axis are plotted in panel (b).

### SI-8: Code of the E-stateXvdW method

See python file provided “E-state\_kT.py”. Before running, read the **READ\_ME.txt** file. Before running, please read the **READ\_ME.txt** file. Ensure that the input file (**smiles.txt**) is correctly formatted and that your Python environment has all required libraries installed, as specified in the **READ\_ME.txt** file. The user can compare and verify their outputs with those provided for the “Shortened version” @298K and the “Detailed version” @195K for the list of SMILES provided.

For any questions, please contact: [lisa.michelat@cncs-orleans.fr](mailto:lisa.michelat@cncs-orleans.fr) / [lisa.michelat@hotmail.fr](mailto:lisa.michelat@hotmail.fr)

### References

- 1 EPA, EPI Suite™-Estimation Program Interface, <https://www.epa.gov/tsca-screening-tools/epi-suite™-estimation-program-interface>, (accessed 17 January 2020).
- 2 E. Kwok and R. Atkinson, *Atmos. Environ.*, 1995, **29**, 1685–1695.
- 3 W. P. L. Carter, *Atmosphere*, 2021, **12**, 1250.

- 4 M. E. Jenkin, R. Valorso, B. Aumont, A. R. Rickard and T. J. Wallington, *Atmos. Chem. Phys.*, 2018, **18**, 9297–9328.
- 5 M. R. McGillen, W. P. L. Carter, A. Mellouki, J. J. Orlando, B. Picquet-Varrault and T. J. Wallington, *Earth System Science Data*, 2020, **12**, 1203–1216.
- 6 J. D'Souza Metcalf, R. K. Winkless, C. Mapelli, C. R. McElroy, C. Roman, C. Arsene, R. I. Olariu, I. G. Bejan and T. J. Dillon, *Atmospheric Chemistry and Physics*, 2025, **25**, 9169–9181.
- 7 P. Dagaut, T. J. Wallington, R. Liu and M. J. Kurylo, *The Journal of Physical Chemistry*, 1988, **92**, 4375–4377.
- 8 K. Tokuhashi, K. Takizawa and S. Kondo, *The Journal of Physical Chemistry A*, 2024, **128**, 1134–1141.
- 9 K. Stemmler, W. Mengon and J. A. Kerr, *Environmental science & technology*, 1996, **30**, 3385–3391.
